# Supplementary figures and images for: Confirmed long‐term safety and efficacy of prophylactic treatment with BAY 94–9027 in severe haemophilia A: final results of the PROTECT VIII extension study
Source: PubMed Central journal article supplement — Haemophilia. 2021 Apr 5;27(3):e347–56. doi: 10.1111/hae.14297 (PMC9290859; doi:10.1111/hae.14297), 2021-04-05

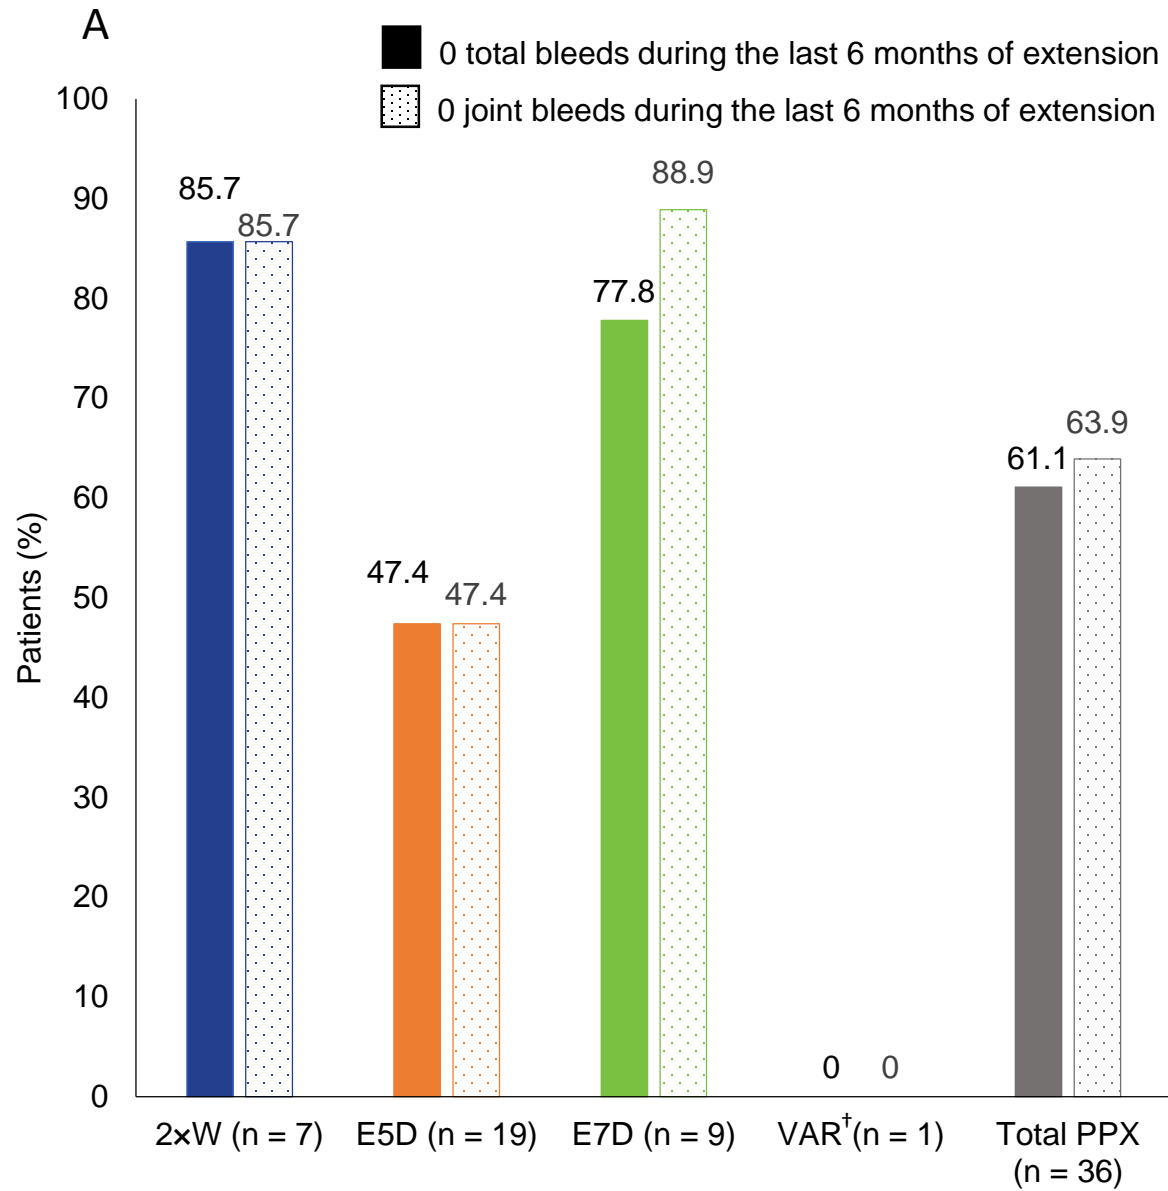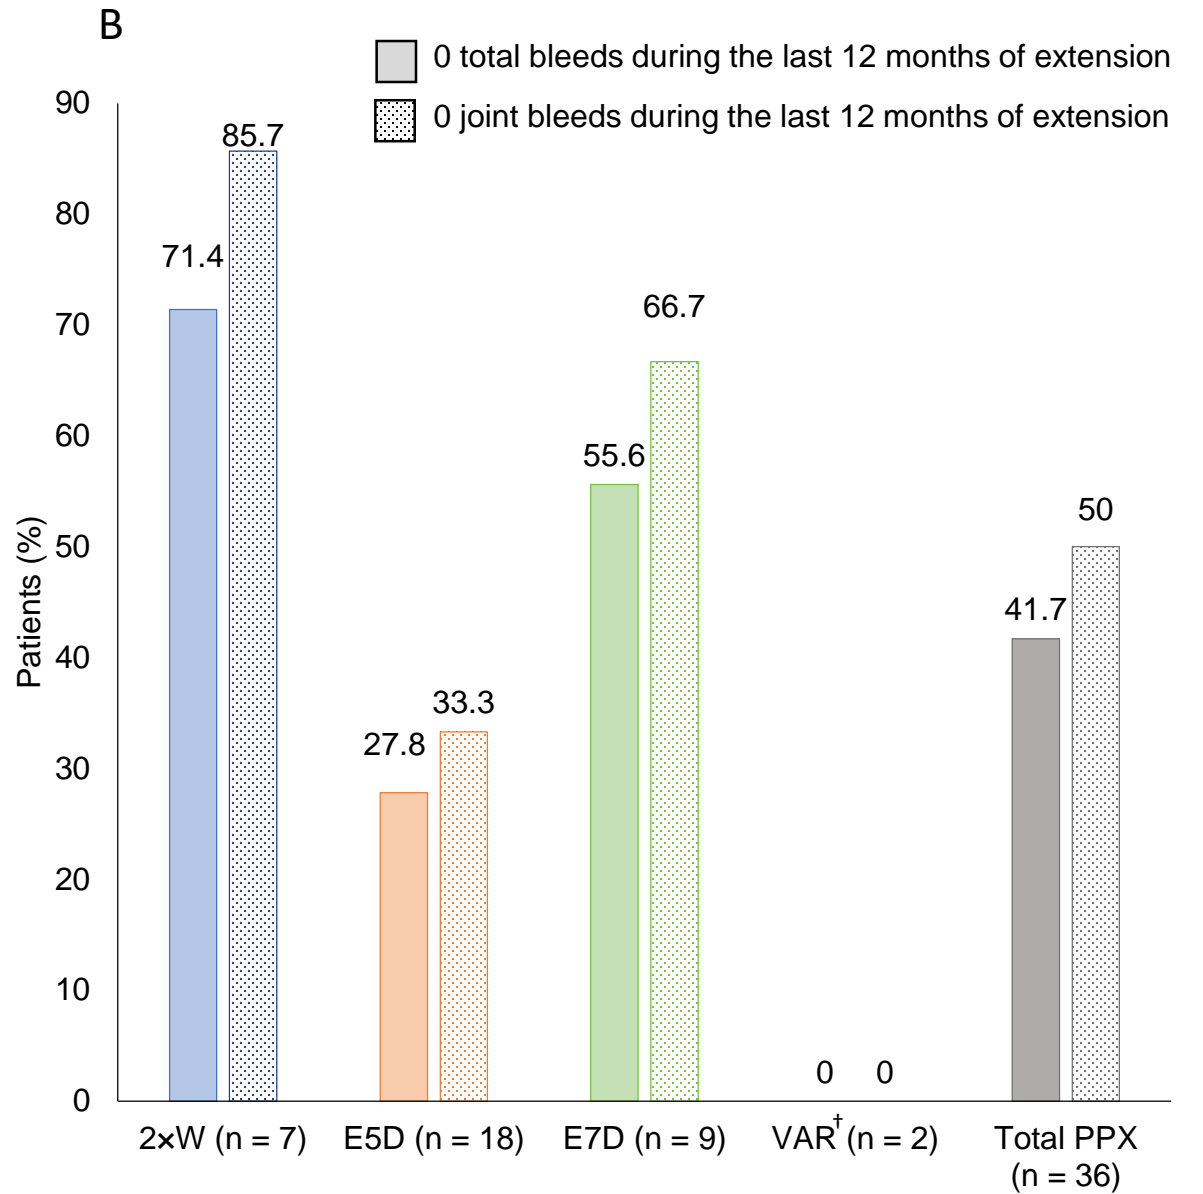

Supplement: HAE-27-e347-s001.pdf [file HAE-27-e347-s001.pdf]

PROTECT VIII

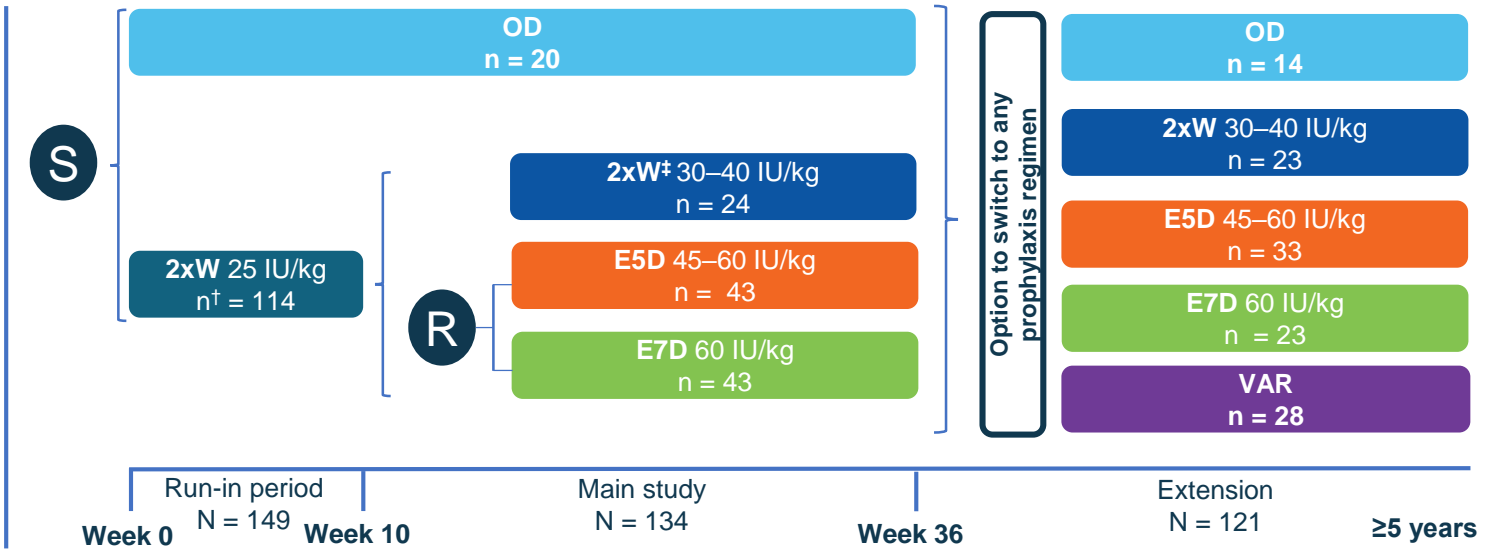

Supplement: HAE-27-e347-s002.pdf [file HAE-27-e347-s002.pdf]
